# Supplementary material for: Impact of Pollutant Ozone on the Biophysical Properties of Tear Film Lipid Layer Model Membranes
Source: MDPI journal article supplement (doi:10.3390/membranes13020165), 2023-01-28
Supplement: s1 [file s1]

# Impact of Pollutant Ozone on the Biophysical Properties of Tear Film Lipid Layer Model Membranes-Supplementary Information

Mahshid Keramatnejad <sup>1</sup>, Christine DeWolf \*

<sup>1</sup> Department of Chemistry & Biochemistry & Centre for Nanoscience Research, Concordia University, 7141 Sherbrooke Street west, H4B1R6, Montreal, Canada; Mahshid.Keramatnejad@concordia.ca

\* Correspondence: Christine.DeWolf@concordia.ca ; Tel.: +1-(514)-848-2424 (ext. )

## 1. Rheology Measurements Program Details

A system-specific program was built to specifically account for the changes of  $1 \text{ mN min}^{-1}$  in the slope of the pressure-area isotherms of each film, allowing efficient experiment time. The CO:PC 90:10 (binary mixture) program underwent an initial compression from  $40 \text{ mm}^2$  to  $37 \text{ mm}^2$ , after which there was an equilibration time of 300 seconds. The drop then underwent 25 oscillations for 156.25 s with an amplitude of 2.50 % (of the drop area) and a frequency of  $0.16 \text{ Hz}$  <sup>64</sup> followed by an equilibration time of 180 s, then compressed to  $34 \text{ mm}^2$ , equilibrated (300 s), and underwent oscillations of the same parameters. After 4 more repeats of this cycle, the program moved on to the next part where, following the binary mixture isotherm slope change, the drop area change was reduced to ensure the  $1 \text{ mN min}^{-1}$  surface pressure increase. Thus, after the 5<sup>th</sup>. oscillations cycles and the equilibration time (180 s), the drop area was reduced from  $25 \text{ mm}^2$  to  $24.2 \text{ mm}^2$ . The same cycle was repeated until the drop area of  $15.1 \text{ mm}^2$  was reached with the rheology experiments providing the measurements of viscosity and elasticity of the film <sup>57,58,60</sup>.

The initial compression of the CO:GT:PC 40:40:20 (ternary mixture) film was from  $40 \text{ mm}^2$  to  $38.66 \text{ mm}^2$ , after which the drop was equilibrated (300 s) and oscillated with the same parameters as before. After the second set of oscillations and the following equilibration time (180 s), to ensure the  $1 \text{ mN min}^{-1}$  increase, the amount of reduction of the drop area was changed. The drop area was reduced from  $37.33 \text{ mm}^2$  to  $35.69 \text{ mm}^2$ , followed by equilibration (300 s), oscillations with the same parameters as before, equilibration (180 s) and the next compression. This cycle was repeated until the 12<sup>th</sup>. set of oscillations had been completed, after whose equilibration (180 s), the next compression comprised of drop area reducing from  $20.95 \text{ mm}^2$  to  $19.8 \text{ mm}^2$ . The same cycle was repeated for a total of 5 times until a drop area of  $15.23 \text{ mm}^2$  was achieved.

The initial compression of the CO:GT:FFA:PC 40:25:15:20 (quaternary mixture) program changed the drop area from  $40 \text{ mm}^2$  to  $38 \text{ mm}^2$ , followed by an equilibration time of 300 s, oscillations with similar parameters as before, and an equilibration time of 180 s. The program then entered its second stage where a change in the drop area reduction size was needed, thus the drop area was reduced from  $38 \text{ mm}^2$  to  $36.1 \text{ mm}^2$ , followed by equilibration time (300 s), oscillations of the same parameters and equilibration time (180 s). This cycle was repeated for a total of 12 times, until the area of the drop reached  $15.2 \text{ mm}^2$ , completing the rheology measurements and providing the dilational surface elasticity and dilational viscosity of the film. For each system, the experiment was repeated at least 4 separate times.

## 2. Criegee Mechanism of Ozonolysis of Cholesteryl Oleate

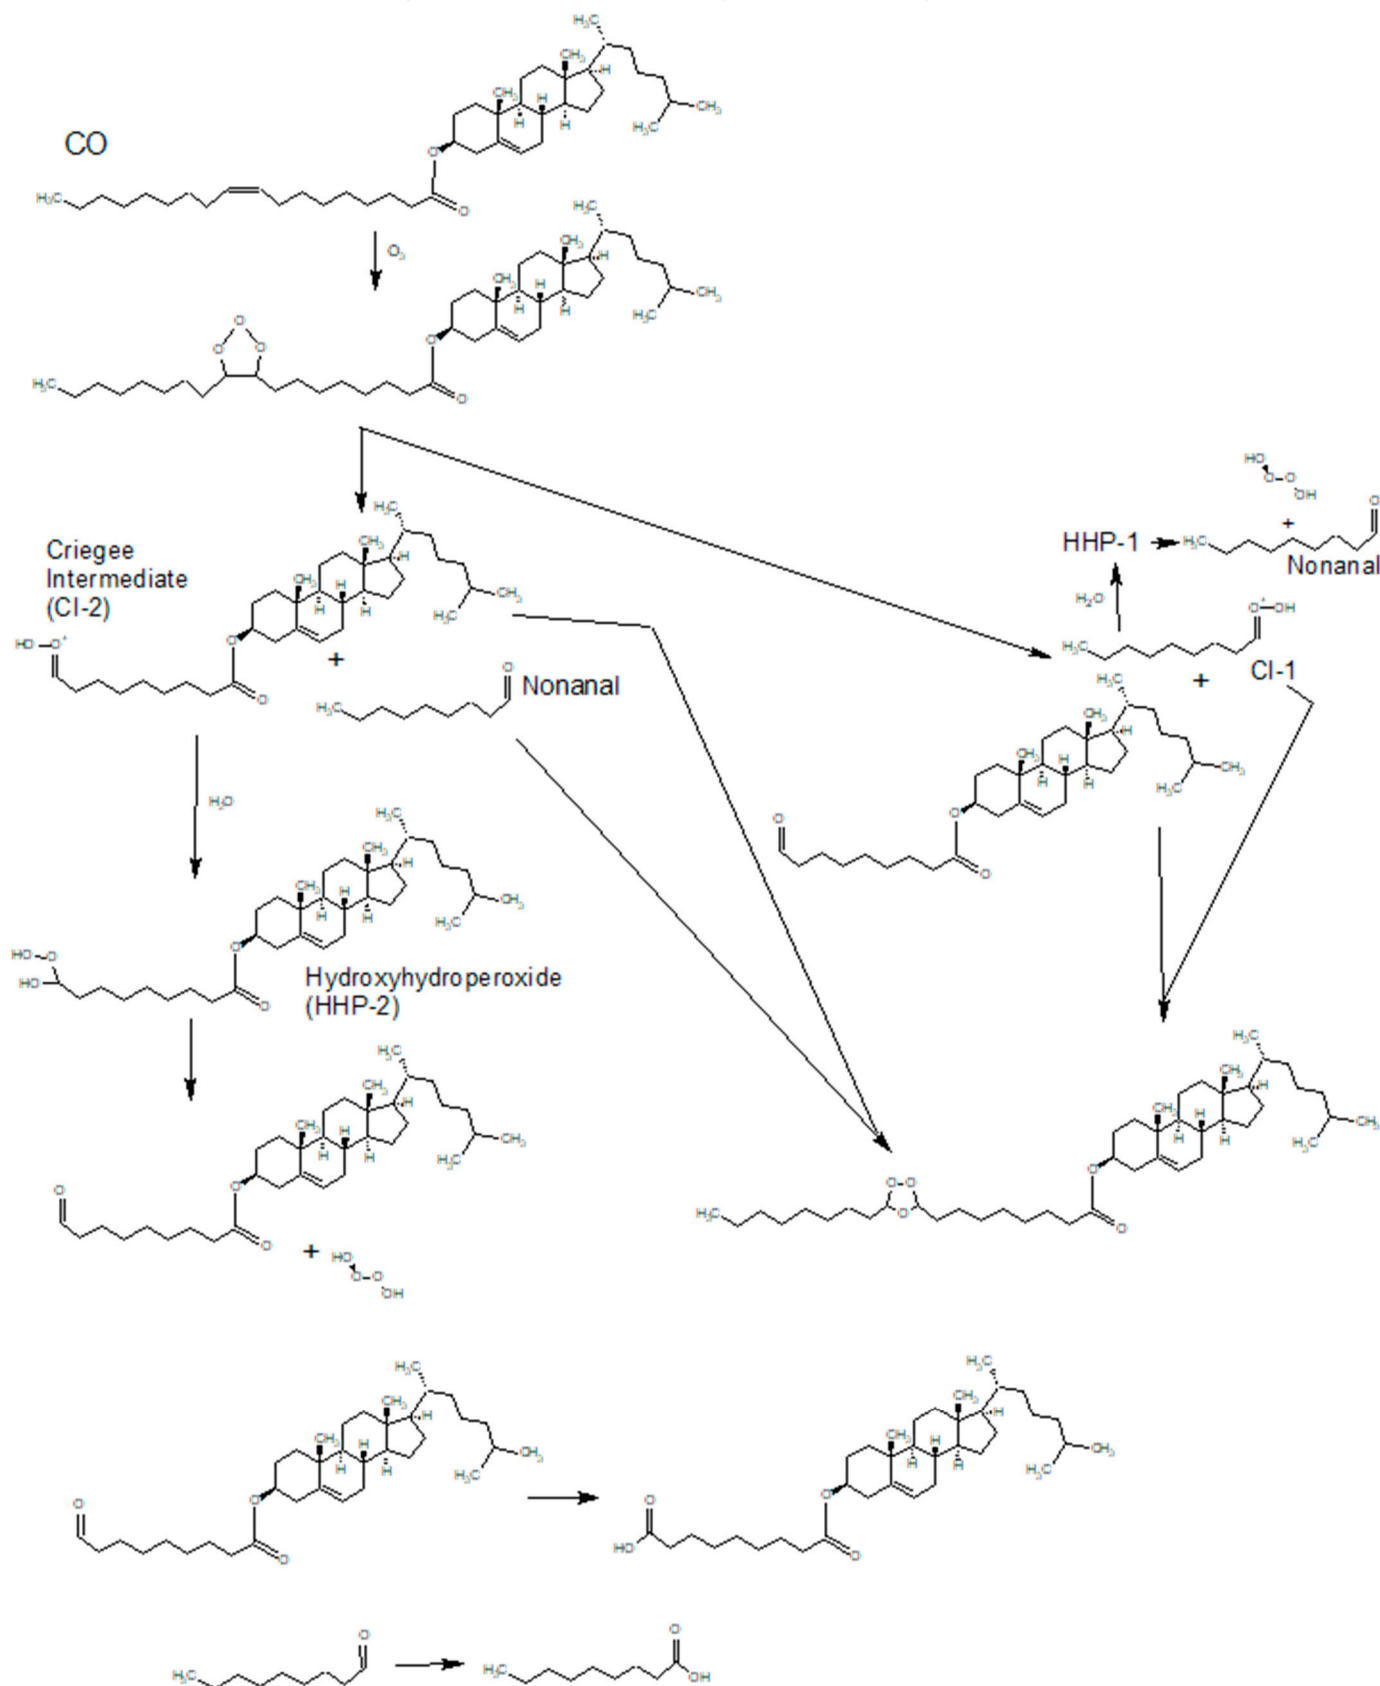

**Figure S1.** Details of the ozonolysis mechanism for cholesteryl oleate (CO) via the Criegee intermediate.

### 3. Contrast, Brightness & Sharpness Enhanced BAM Images of CO:PC 90:10 (Binary Mixture) and CO:GT:FFA:PC 40:25:15:20 (Quaternary mixture) After Ozone Exposure

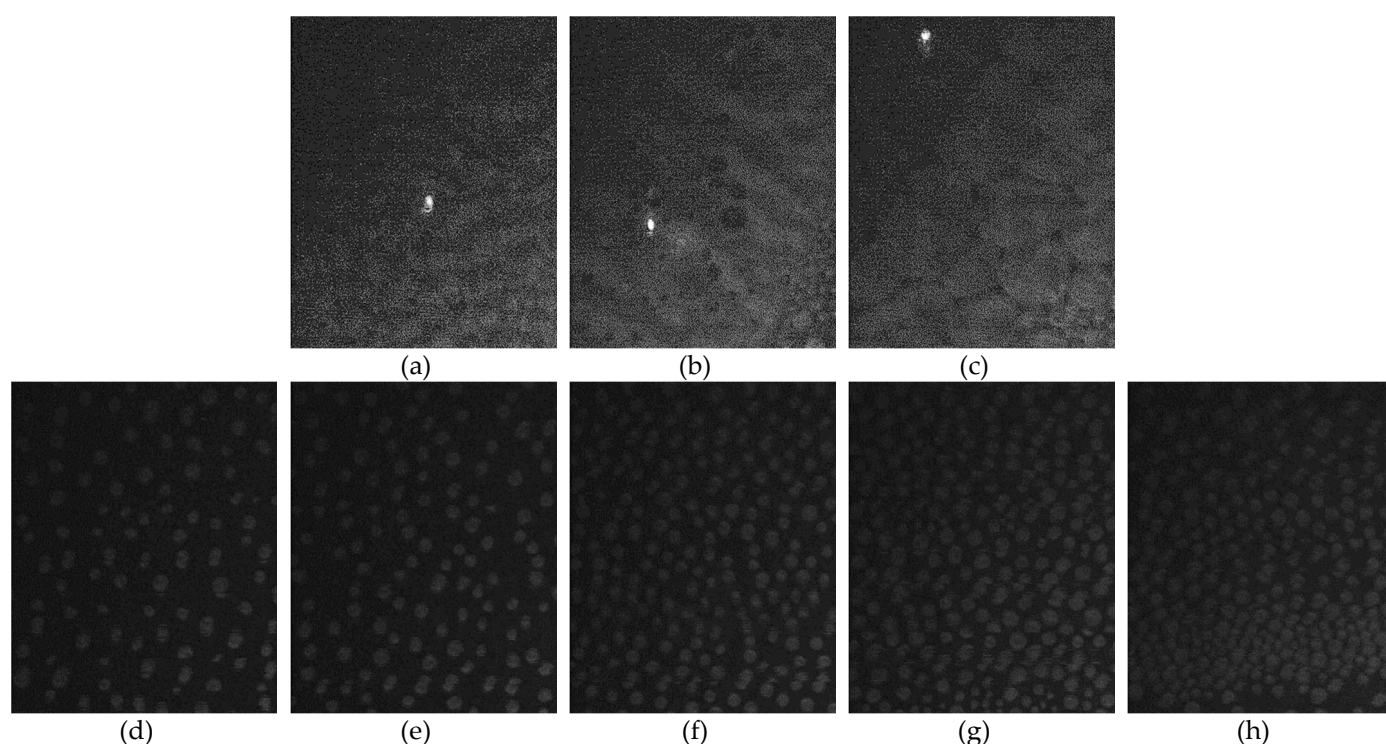

**Figure S2.** Contrast, brightness and sharpness enhanced BAM images (220  $\mu\text{m}$  wide) of TFL model membranes after ozone exposure on PBS at 22  $^{\circ}\text{C}$ . TOP ROW: CO:PC 90:10 (binary mixture) film at surface pressures (a) 3  $\text{mNm}^{-1}$ ; (b) 4  $\text{mNm}^{-1}$ ; and (c) 5  $\text{mNm}^{-1}$ . The enhanced BAM images of the film at these surface pressure show the progression of the appearance of circular domains with low contrast. BOTTOM ROW: CO:GT:FFA:PC 40:25:15:20 (quaternary mixture) at surface pressures: (d) 5  $\text{mNm}^{-1}$ ; (e) 9  $\text{mNm}^{-1}$ ; (f) 13  $\text{mNm}^{-1}$  (g) 16  $\text{mNm}^{-1}$ ; and (h) 18  $\text{mNm}^{-1}$ .

#### 4. Compression-Expansion Cycles of Binary, Ternary, & Quaternary Mixtures

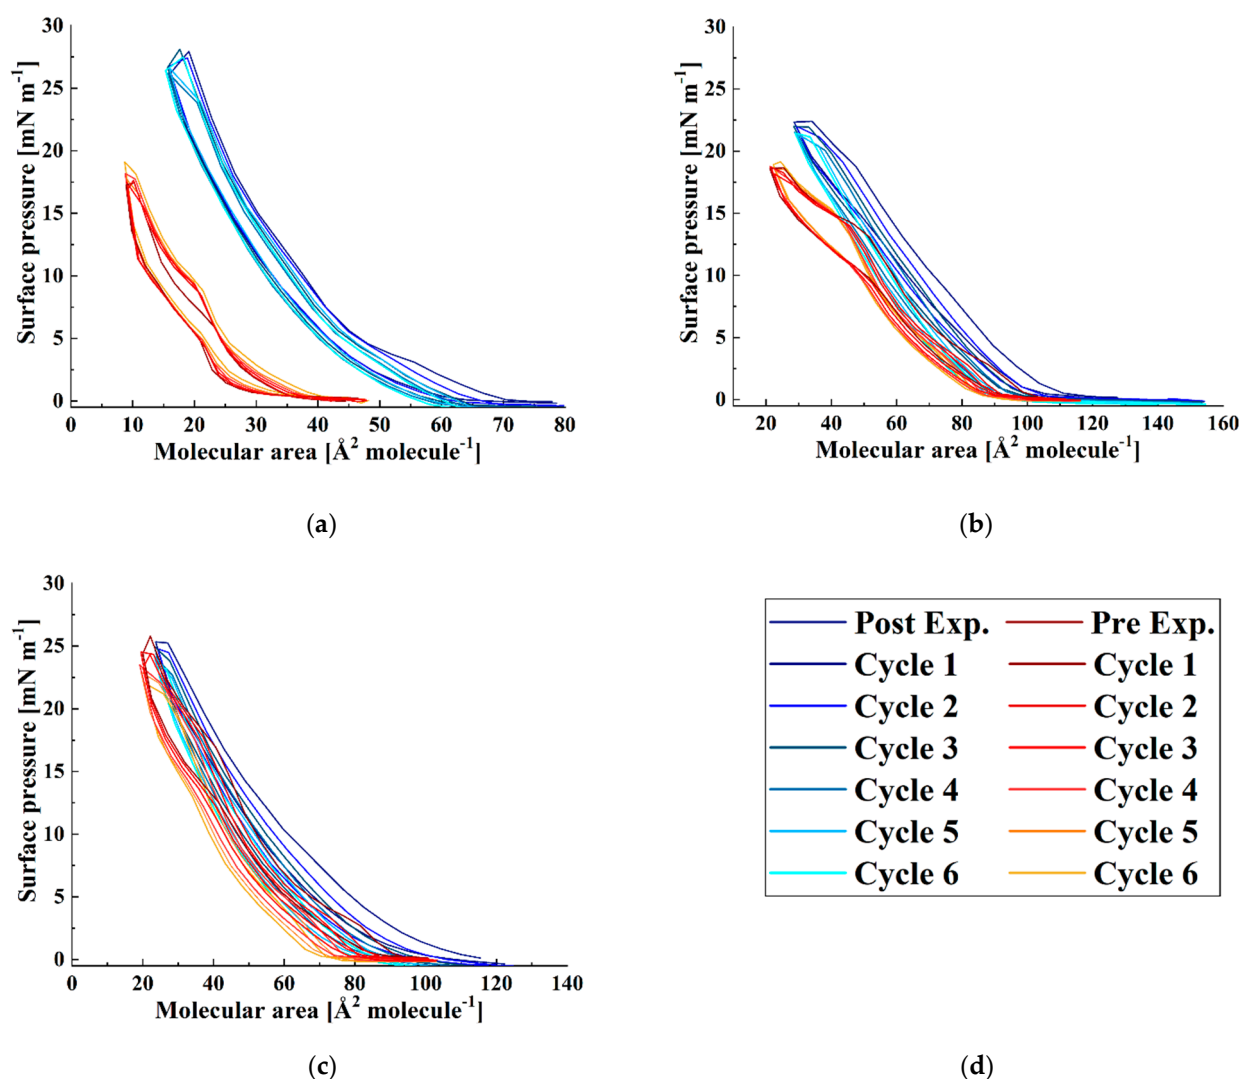

**Figure S3.** Compression-expansion cycles of (a): CO:PC 90:10 (binary mixture); (b): CO:GT:PC 40:40:20 (ternary mixture); (c): and CO:GT:FFA:PC 40:25:15:20 (quaternary mixture) before ozone exposure (d, red color family) and after ozone exposure (d, blue color family) on PBS at 22 °C.

## 5. Products of Ozonolysis

**Table S1.** ESI-MS data for oxidized cholesteryl oleate.

| Structure                                                                           | Theoretical<br>m/z | Observed<br>m/z | Mass Error<br>(ppm) | Signal In-<br>tensity | Mode     |
|-------------------------------------------------------------------------------------|--------------------|-----------------|---------------------|-----------------------|----------|
| 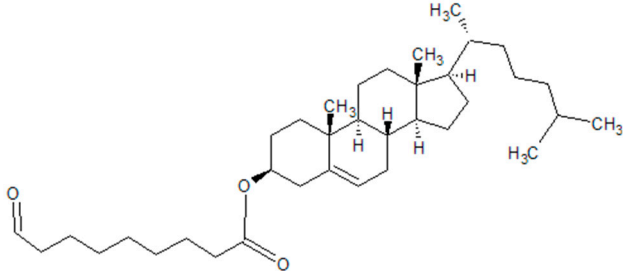   | 541.4615           | 541.4614        | -0.0907             | 1.13E+05              | Positive |
|   | 557.4564           | 557.4566        | 0.3606              | 8.94E+04              | Positive |
|  | 699.5922           | 699.5957        | 5.0825              | 2.72E+06              | Positive |

**Table S2.** ESI-MS data for oxidized glyceryl trioleate.

| Structure | Theoretical<br>m/z | Observed<br>m/z | Mass Er-<br>ror<br>(ppm) | Signal<br>Intensity | Mode     |
|-----------|--------------------|-----------------|--------------------------|---------------------|----------|
|           | 789.6249           | 789.6239        | -1.3773                  | 7.74E+03            | Negative |
|           | 695.4739           | 695.4738        | -0.1847                  | 4.93E+03            | Negative |
|           | 679.4790           | 679.4793        | 0.4644                   | 1.18E+04            | Negative |
|           | 585.3280           | 585.3281        | 0.2577                   | 1.28E+06            | Negative |

| Structure                                                                          | Theoretical<br>m/z | Observed<br>m/z | Mass Er-<br>ror<br>(ppm) | Signal<br>Intensity | Mode     |
|------------------------------------------------------------------------------------|--------------------|-----------------|--------------------------|---------------------|----------|
| 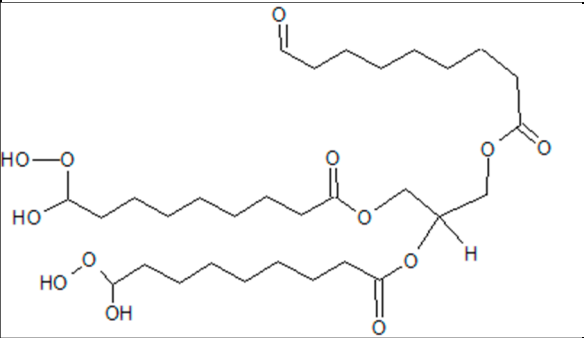   | 621.3491           | 621.3412        | -12.6749                 | 1.44E+05            | Negative |
|   | 637.3440           | 637.3483        | 6.6855                   | 4.91E+03            | Negative |
|  | 569.3331           | 569.3333        | 0.3751                   | 1.37E+06            | Negative |
|  | 601.3229           | 601.3231        | 0.4067                   | 1.38E+05            | Negative |

Table S3. ESI-MS data for oxidized egg PC.

| Structure                                                                          | Theoretical<br>m/z | Observed<br>m/z | Mass Er-<br>ror<br>(ppm) | Signal<br>Intensity | Mode     |
|------------------------------------------------------------------------------------|--------------------|-----------------|--------------------------|---------------------|----------|
| 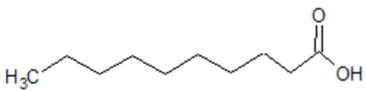  | 171.1390           | 171.1393        | 1.5435                   | 1.06E+06            | Negative |
|   | 635.4167           | 635.4115        | -8.2534                  | 4.09E+03            | Negative |
|  | 651.4116           | 651.4111        | -0.8842                  | 5.67E+03            | Negative |
